# Supplementary material for: Fibroblast growth factor 10 reverses cigarette smoke- and elastase-induced emphysema and pulmonary hypertension in mice
Source: PubMed Central journal article supplement — Eur Respir J. 2023 Nov 9;62(5):2201606. doi: 10.1183/13993003.01606-2022 (PMC10632559; doi:10.1183/13993003.01606-2022), 2023-11-09

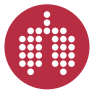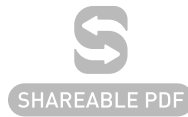

# Fibroblast growth factor 10 reverses cigarette smoke- and elastase-induced emphysema and pulmonary hypertension in mice

Stefan Hadzic<sup>1</sup>, Cheng-Yu Wu<sup>1</sup>, Marija Gredic<sup>1</sup>, Oleg Pak<sup>1</sup>, Edma Loku<sup>1</sup>, Simone Kraut<sup>1</sup>, Baktybek Kojonazarov<sup>1,2</sup>, Jochen Wilhelm<sup>1,2</sup>, Monika Brosien<sup>1</sup>, Mariola Bednorz<sup>1</sup>, Michael Seimetz<sup>1</sup>, Andreas Günther<sup>1</sup>, Djuro Kosanovic<sup>1,3</sup>, Natascha Sommer<sup>1</sup>, David Warburton<sup>4,5</sup>, Xiaokun Li<sup>6</sup>, Friedrich Grimminger<sup>1</sup>, Hossein A. Ghofrani<sup>1</sup>, Ralph T. Schermuly<sup>1</sup>, Werner Seeger<sup>1,7</sup>, Elie El Agha<sup>1,2</sup>, Saverio Bellusci<sup>8,9,10</sup> and Norbert Weissmann<sup>1,10</sup>

<sup>1</sup>Excellence Cluster Cardio-Pulmonary Institute (CPI), Universities of Giessen and Marburg Lung Center (UGMLC), Member of the German Center for Lung Research (DZL), Justus-Liebig-University, Giessen, Germany. <sup>2</sup>Institute for Lung Health (ILH), Justus-Liebig-University, Giessen, Germany. <sup>3</sup>Sechenov First Moscow State Medical University (Sechenov University), Moscow, Russia. <sup>4</sup>Children's Hospital Los Angeles, Los Angeles, CA, USA. <sup>5</sup>Keck School of Medicine, University of Southern California, Los Angeles, CA, USA. <sup>6</sup>School of Pharmaceutical Sciences, Wenzhou Medical University, Wenzhou, P.R. China. <sup>7</sup>Max-Planck Institute for Heart and Lung Research, Bad Nauheim, Germany. <sup>8</sup>Oujiang Laboratory (Zhejiang Laboratory for Regenerative Medicine, Vision and Brain Health), School of Pharmaceutical Science, Wenzhou Medical University, Wenzhou, P.R. China. <sup>9</sup>Laboratory of Extracellular Matrix Remodelling, Excellence Cluster Cardio-Pulmonary Institute (CPI), Universities of Giessen and Marburg Lung Center (UGMLC), Member of the German Center for Lung Research (DZL), Justus-Liebig-University, Giessen, Germany. <sup>10</sup>S. Bellusci and N. Weissmann contributed equally to this article as lead authors and supervised the work.

Corresponding author: Norbert Weissmann ([norbert.weissmann@innere.med.uni-giessen.de](mailto:norbert.weissmann@innere.med.uni-giessen.de))

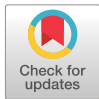

Shareable abstract (@ERSpublications)

**Impaired FGF10 signalling is an integral part of the pathomechanism that leads to development of cigarette smoke-induced emphysema and PH. Restoration of FGF10 signalling reverses established cigarette smoke- and elastase-induced emphysema and PH in mice.** <https://bit.ly/3PgqrBw>

**Cite this article as:** Hadzic S, Wu C-Y, Gredic M, et al. Fibroblast growth factor 10 reverses cigarette smoke- and elastase-induced emphysema and pulmonary hypertension in mice. *Eur Respir J* 2023; 62: 2201606 [DOI: 10.1183/13993003.01606-2022].

This extracted version can be shared freely online.

Copyright ©The authors 2023.

This version is distributed under the terms of the Creative Commons Attribution Non-Commercial Licence 4.0. For commercial reproduction rights and permissions contact [permissions@ersnet.org](mailto:permissions@ersnet.org)

This article has an editorial commentary: <https://doi.org/10.1183/13993003.01691-2023>

Received: 16 Aug 2022  
Accepted: 28 Aug 2023

## Abstract

**Background** COPD is an incurable disease and a leading cause of death worldwide. In mice, fibroblast growth factor (FGF)10 is essential for lung morphogenesis, and in humans, polymorphisms in the human *FGF10* gene correlate with an increased susceptibility to develop COPD.

**Methods** We analysed FGF10 signalling in human lung sections and isolated cells from healthy donor, smoker and COPD lungs. The development of emphysema and PH was investigated in *Fgf10*<sup>+/-</sup> and *Fgfr2b*<sup>+/-</sup> (FGF receptor 2b) mice upon chronic exposure to cigarette smoke. In addition, we overexpressed FGF10 in mice following elastase- or cigarette smoke-induced emphysema and pulmonary hypertension (PH).

**Results** We found impaired FGF10 expression in human lung alveolar walls and in primary interstitial COPD lung fibroblasts. In contrast, FGF10 expression was increased in large pulmonary vessels in COPD lungs. Consequently, we identified impaired FGF10 signalling in alveolar walls as an integral part of the pathomechanism that leads to emphysema and PH development: mice with impaired FGF10 signalling (*Fgf10*<sup>+/-</sup> and *Fgfr2b*<sup>+/-</sup>) spontaneously developed lung emphysema, PH and other typical pathomechanistic features that generally arise in response to cigarette smoke exposure.

**Conclusion** In a therapeutic approach, FGF10 overexpression successfully restored lung alveolar and vascular structure in mice with established cigarette smoke- and elastase-induced emphysema and PH. FGF10 treatment triggered an initial increase in the number of alveolar type 2 cells that gradually returned to the basal level when the FGF10-mediated repair process progressed. Therefore, the application of recombinant FGF10 or stimulation of the downstream signalling cascade might represent a novel therapeutic strategy in the future.

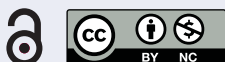

Supplement: ERJ-01606-2022.Shareable.pdf [file ERJ-01606-2022.Shareable.pdf]
